# Supplementary material for: Loss of Nuclear TDP-43 Impairs Lipid Metabolism in Microglia-Like Cells
Source: Research Square preprint supplement (doi:10.21203/rs.3.rs-8036170/v1), 2025-11-20
Supplement: Supplementary file 1 [file 8b7bfcf97b24133e8950d10e.xlsx]

## Sheet: Sheet1
	Log2FC	log10p (unpaired t-test)
CCL4	-1.81666	0.553733
IL10	-0.889287	0.436252
LPCAT1	-0.827951	0.429122
BSCL2	-0.761456	1.01923
LPL	-0.546903	0.676816
CCL5	-0.444639	0.521539
EDG3	-0.415449	0.209684
ISG15	-0.338964	0.345616
CERS1	-0.258286	0.152838
LSS	-0.146217	0.194088
ABCA1	-0.0492163	0.0657273
ELOVL7	-0.029795	0.0148305
APOE	-0.012648	0.0087398
CD36	-0.0018971	0.00104095
IL6	0.0259716	0.234946
TREM2	0.0299931	0.020908
PFKP	0.0680076	0.0594467
HK2	0.104368	0.157263
TNFA	0.105238	0.0405055
PLIN3	0.109496	0.181905
PLIN2	0.11094	0.0630768
MBTPS2	0.112077	0.0875447
IL18	0.184591	0.230643
PLA2G15	0.195025	0.250853
LIPA	0.199533	0.168924
GPAT3	0.209056	0.252059
AGPAT1	0.213862	0.382637
CPT2	0.214885	0.434504
ATGL(PNPLA2)	0.21715	0.208706
CXCL8	0.218451	0.0702225
PLA2G7	0.22024	0.221871
ENO1	0.232489	0.477938
GPI	0.233808	0.502701
TPI1	0.246716	0.280521
DGAT1	0.252847	0.396636
CD68	0.254277	0.39485
GPAT4	0.264233	0.410179
ACAT1	0.272092	0.640476
TUBB	0.278997	0.557243
DHCR24	0.28821	0.502193
ATG16L1	0.314371	0.49518
SCARB1	0.325638	0.31858
TREM1	0.328403	0.114367
Asah1	0.331656	0.620765
ALDOA	0.333068	0.848618
NPC1	0.344562	1.56788
MYD88	0.360662	0.676647
FUS	0.36817	0.503166
PGK1	0.372369	0.891506
TLR4	0.378725	0.549232
ACSL5	0.380182	0.486861
ACSL1	0.395216	0.507558
PISD	0.414745	0.48066
PPARG	0.422313	0.491582
GLUT1	0.426425	0.639895
LRP1	0.429681	0.921637
DAP12	0.432295	0.613132
MBTPS1	0.433667	0.710063
HK1	0.441057	1.11939
TGFB	0.443855	0.620694
MGLL	0.467674	0.334624
HSL	0.477749	0.389888
INPP5D	0.502849	0.590314
FABP5	0.513802	0.535682
STARD7	0.534827	0.688729
TARDBP	0.550388	0.914082
SOAT1	0.558324	0.947953
MGAT1	0.591042	0.929995
ELOVL3	0.61045	0.287991
DDHD2	0.610985	0.653002
PKM	0.635468	0.760931
CD63	0.651976	1.12152
CASP9	0.655477	1.60539
ACSL4	0.67547	0.931566
G6PD	0.695822	0.778351
ABCG1	0.725921	1.05619
LCAT	0.727512	0.544583
SREBP2	0.786123	0.74136
PLCG2	0.796071	0.906274
FASN	0.815771	0.677677
DGAT2	0.830375	0.586264
HMGCR	0.839998	0.746669
ALDOC	0.962418	0.723993
SREBP1	0.96699	1.21316
FABP4	0.973968	0.756017
IL1B	1.07924	0.89871
LDLR	1.22408	0.842882
NLRP3	1.4065	0.381498
FADS1	1.44051	0.866848
INSIG1	1.59023	0.895073
CXCL1	1.74681	0.39006
DHCR7	1.96219	0.69739
