# Supplementary material for: Loss of Nuclear TDP-43 Impairs Lipid Metabolism in Microglia-Like Cells
Source: Research Square preprint supplement (doi:10.21203/rs.3.rs-8036170/v1), 2025-11-20
Supplement: Supplementary file 2 [file e08ed93d38f42577207b7a5a.xlsx]

## Sheet: Sheet1
Gene	Log2FC	log10p (unpaired multiple t-test)
IL10	-1.11878	0.604237
CD36	-0.925406	1.14443
ABCA1	-0.793814	0.572756
LPCAT1	-0.625199	0.395046
PLIN2	-0.415909	0.341938
TNFA	-0.410114	0.200575
HK2	-0.398547	0.400596
EDG3	-0.344527	0.404267
ABCG1	-0.341246	0.348423
CERS1	-0.325361	0.317612
MGLL	-0.314829	0.3268
LCAT	-0.311268	0.302472
DDHD2	-0.243736	0.430165
CXCL8	-0.236791	0.0892993
CCL4	-0.231228	0.0681385
MBTPS1	-0.207965	0.187464
GLUT1	-0.185964	0.298454
ATG16L1	-0.185136	0.2052
LPL	-0.182513	0.260843
TUBB	-0.168236	0.609139
MBTPS2	-0.152607	0.0789277
GPAT4	-0.137483	0.14779
ENO1	-0.124111	0.198514
DGAT2	-0.116756	0.0870758
DGAT1	-0.111931	0.109644
MGAT1	-0.0764389	0.0985744
ACSL5	-0.0691118	0.0595134
TLR4	-0.0600563	0.0700505
STARD7	-0.0535354	0.065013
APOE	-0.0534061	0.0355014
TPI1	-0.0455011	0.0459602
BSCL2	-0.0376483	0.0357135
AGPAT1	-0.0313428	0.0308125
ATGL(PNPLA2)	-0.0308518	0.0282613
TARDBP	-0.030376	0.05543
IL18	-0.0046341	0.0085617
PFKP	0.0151374	0.0161154
FUS	0.0166525	0.0319338
LSS	0.0333286	0.0328556
HK1	0.0344786	0.0549354
ACSL1	0.0432878	0.0517465
NLRP3	0.0454381	0.0194331
ISG15	0.0491936	0.0435165
ACAT1	0.0498435	0.0788241
PGK1	0.0758813	0.123946
PLA2G7	0.0787112	0.0563042
GPI	0.0855459	0.11652
ELOVL7	0.10243	0.103176
FABP5	0.118246	0.122872
CCL5	0.124153	0.0432142
ACSL4	0.127273	0.205131
FABP4	0.163613	0.0633234
PLIN3	0.17914	0.254167
PPARG	0.187935	0.239377
LRP1	0.193577	0.335043
GPAT3	0.194637	0.1814
IL1B	0.197247	0.0863281
FASN	0.197884	0.383698
PLCG2	0.202576	0.374521
SCARB1	0.21117	0.227658
CD68	0.212219	0.393856
PISD	0.212703	0.271614
CPT2	0.221255	0.406604
Asah1	0.233076	0.368371
NPC1	0.246001	0.571363
TGFB	0.247138	0.296656
ALDOA	0.274	0.656371
SREBP2	0.276526	0.494789
SREBP1	0.295254	0.463493
LIPA	0.295519	0.294048
DAP12	0.308738	0.607711
SOAT1	0.316661	0.739559
TREM1	0.339609	0.212609
G6PD	0.3402	0.603349
PKM	0.357113	0.878834
CD63	0.35844	0.555301
CASP9	0.394191	1.24705
PLA2G15	0.41615	0.563224
HMGCR	0.466129	0.780523
DHCR24	0.468715	1.34549
HSL (LIPE)	0.512347	0.42282
INPP5D	0.522129	0.812023
MYD88	0.536234	1.15825
ALDOC	0.70954	0.795676
TREM2	0.767491	0.746313
FADS1	0.76819	1.59154
CXCL1	0.808052	0.701522
INSIG1	0.813954	1.1686
LDLR	0.932413	1.33596
PLIN5	1.14454	0.811975
IL6	1.21576	0.543027
ELOVL3	1.24975	0.640383
DHCR7	1.62948	1.67681
