# Supplementary material for: Loss of Nuclear TDP-43 Impairs Lipid Metabolism in Microglia-Like Cells
Source: Research Square preprint supplement (doi:10.21203/rs.3.rs-8036170/v1), 2025-11-20
Supplement: Supplementary file 3 [file fa210b4627e1d42af022c075.xlsx]

## Sheet: Sheet1
Gene ID	Log2FC (control vs knockdown)	P value (control vs knockdown)	Log2FC (knockdown vs knockdown+drug)	P value (knockdown vs knockdown+drug)	Log2FC (control vs control+drug)	P value (control vs control+drug)	Log2FC (control+drug vs knockdown+drug)	P value (control+drug vs knockdown+drug)	All Gene Ontology Category
ABCA1	-0.748797	0.000132	-1.70744	0.017272	-1.05101	0.548948	-1.41988	0.002566	Cholesterol Metabolism
ABCC4	-1.23923	0.006428	-1.09375	0.005416	-1.95978	0.118514	-0.63	0.067849	Cholesterol Metabolism
ABCG1	0.0130248	0.78577	-0.497266	0.726495	-0.68736	0.652814	0.209118	0.458441	Cholesterol Metabolism
ACAT1	-0.046794	0.684532	-1.64668	0.001018	-0.929838	0.455679	-0.771683	0.001671	Cholesterol Metabolism
ACSL1	0.454035	0.00929	-0.615619	0.790125	-0.460796	0.884561	0.398529	0.062462	Fatty Acid Metabolism
ACSL4	0.501277	0.002359	-1.43644	0.039839	-0.719064	0.61893	-0.231208	0.374883	Fatty Acid Metabolism
ACSL5	-0.50482	0.061748	-0.305682	0.392929	-0.437893	0.939982	-0.644981	0.137413	Fatty Acid Metabolism
AGPAT1	-0.669688	2.3e-05	-1.54243	0.009814	-1.0077	0.571291	-0.905454	0.004219	Triglyceride Metabolism
AGPAT2	-0.156568	0.626568	0.124177	0.461173	0.312333	0.746478	-0.722583	0.448905	Triglyceride Metabolism
ALDH1A2	-0.63366	0.018157	0.896465	0.338801	0.706793	0.338802	1.39446	0.340893	Other Metabolism
ALDOA	0.0537047	0.1462	-1.56284	0.013017	-1.16522	0.442973	-0.372373	0.201581	Carbohydrate Metabolism
ALDOC	0.241831	0.839106	1.16631	0.010131	0.365764	0.779478	0.667018	0.04926	Carbohydrate Metabolism
APOBR	-0.694234	0.000139	-2.37	9e-05	-1.75807	0.091623	-1.04896	0.000182	Triglyceride Metabolism
Asah1	-0.578541	0.000126	-1.23037	0.07234	-1.0595	0.453939	-0.662066	0.016093	Fatty Acid Metabolism
ATG16L1	-0.688278	1.2e-05	-1.28374	0.023189	-0.664691	0.656356	-1.4692	0.000496	Autophagy
ATG7	-0.470054	0.00709	-1.07848	0.017729	-1.14167	0.027277	-0.399623	0.259883	Autophagy
ATGL	0.494358	0.000709	0.412974	0.06494	0.22302	0.014283	0.614161	0.024211	Triglyceride Metabolism
ATP5F1	-0.653749	0.000394	-1.46381	0.008334	-1.36282	0.053317	-0.69519	0.021469	Other Metabolism
BSCL2	4.23036	0.004961	-1.25663	0.020368	0.701103	0.197242	3.9371	0.005904	Triglyceride Metabolism
CASP9	-0.817258	0.000427	-0.217977	0.728024	0.191193	0.375674	-1.12959	0.000143	Other Metabolism
CCL4	2.38606	0.003024	-3.73233	0.000354	0.338543	0.886109	-0.985439	0.801319	Immune Response
CCL5	0.285068	0.425593	-0.333632	0.214997	0.706345	0.203507	-0.611886	0.206282	Immune Response
CD33	-0.564636	0.001958	-1.28842	0.069448	-1.90641	0.162405	-0.0617301	0.028579	Immune Response
CD36	-0.29697	0.047493	-1.13208	0.088547	-0.911178	0.695368	-0.553522	0.023464	Fatty Acid Metabolism
CD63	-0.222266	0.296897	-1.90415	0.00131	-0.710881	0.298018	-1.58543	0.040061	Immune Response
CD68	-0.360301	0.002611	-1.22659	0.136322	-0.974387	0.741569	-0.577542	0.082815	Immune Response
CD9	-0.944642	9.4e-05	-1.7845	0.176207	-1.89006	0.072127	-0.819562	0.212732	Immune Response
CERS1	-0.501307	0.23913	1.08173	0.01644	0.444797	0.34352	0.200566	0.400771	Phospholipid Metabolism
CPT2	-0.370854	0.00109	-1.7326	0.011076	-1.13749	0.383124	-0.705907	0.008973	Fatty Acid Metabolism
CTSD	-0.622533	0.002163	-1.2234	0.403148	-1.5715	0.182357	-0.271892	0.418964	Autophagy
CXCL1	-0.795446	0.040506	-2.1115	0.272385	-0.873552	0.856493	-3.80533	0.000179	Immune Response
CXCL8	0.31939	0.149761	0.0484295	0.312862	1.21443	0.084057	-0.750042	0.358979	Immune Response
CYP27A1	-0.271288	0.013025	-1.23673	0.14308	-1.55275	0.255648	0.0580936	0.424225	Cholesterol Metabolism
DAP12	0.0365325	0.246195	-1.63347	0.009364	-1.34814	0.38076	-0.230376	0.201295	Immune Response
DDHD2	-0.607782	0.000705	-1.03299	0.059498	-0.775057	0.450298	-0.75167	0.013574	Triglyceride Metabolism
DGAT1	-0.28583	0.008109	-0.548723	0.154915	-0.244737	0.779534	-0.5464	0.017026	Triglyceride Metabolism
DGAT2	-0.124178	0.886371	-0.749464	0.046759	-0.701131	0.421532	-0.358918	0.219862	Triglyceride Metabolism
DHCR24	-0.498313	0.011022	-1.97163	0.000125	-0.946334	0.293005	-1.32088	0.007395	Cholesterol Metabolism
DHCR7	0.302261	0.106568	-1.7231	0.001903	-0.775377	0.084498	-0.197381	0.314818	Cholesterol Metabolism
EDG3	-0.161969	0.85448	0.775158	0.008394	0.361142	0.108956	0.298493	0.022723	Phospholipid Metabolism
ELOVL3	3.48521	0.038489	0.066633	0.265277	1.77587	0.038575	1.31615	0.197042	Fatty Acid Metabolism
ELOVL7	-1.45452	0.009391	0.503193	0.054056	0.514151	0.222283	-0.93438	0.085953	Fatty Acid Metabolism
ENO1	-0.84114	4.8e-05	-1.01698	0.000456	-0.505751	0.045012	-1.29369	0.000371	Carbohydrate Metabolism
ERLIN2	-0.0204991	0.820483	-0.984493	0.429098	-0.8171	0.287138	-0.0802801	0.849106	Cholesterol Metabolism
FABP4	3.02007	0.003232	0.457185	0.166432	1.10316	0.266285	2.27281	0.012578	Fatty Acid Metabolism
FABP5	0.235971	0.077308	0.238192	0.143846	0.216462	0.139336	0.327308	0.118953	Fatty Acid Metabolism
FADS1	0.612804	0.000274	-1.39391	0.003973	-1.04727	0.47986	0.25843	0.349621	Fatty Acid Metabolism
FASN	-0.333373	0.260831	-1.48904	0.000411	-0.936721	0.001481	-0.911086	0.015985	Fatty Acid Metabolism
FUS	-0.99832	1e-06	-1.418	0.000573	-1.02791	0.394898	-1.34697	5.1e-05	RNA Processing/Neurodegeneration
G6PD	-1.32611	2.4e-05	-0.485528	0.196557	-0.263242	0.402171	-1.52573	0.000512	Carbohydrate Metabolism
GLUT1	-1.06467	0.002924	-0.378176	0.611458	-0.272768	0.082415	-1.10962	0.010372	Carbohydrate Metabolism
GPAT3	-1.36948	3.2e-05	-1.6154	0.000191	-1.29937	0.380633	-1.58642	0.00013	Triglyceride Metabolism
GPAT4	-0.0952655	0.375854	-1.23906	0.019358	-1.00369	0.491188	-0.520743	0.185561	Triglyceride Metabolism
GPI	-0.334442	0.000319	-0.733358	0.01866	-0.372432	0.218855	-0.695619	0.003158	Carbohydrate Metabolism
HK1	0.871375	1.7e-05	-0.853713	0.027171	-0.465655	0.168593	0.413161	0.004049	Carbohydrate Metabolism
HK2	-0.398334	0.050641	-0.14286	0.940707	0.157606	0.394519	-0.666269	0.12485	Carbohydrate Metabolism
HMGCR	-0.453385	0.011003	-1.11577	0.019018	-0.973933	0.317834	-0.846705	0.02371	Cholesterol Metabolism
HSL (LIPE)	1.40846	0.095501	-1.43721	0.233151	1.30788	0.351932	0.0971979	0.645706	Triglyceride Metabolism
IFIT3	0.067285	0.519259	0.152328	0.48826	0.35656	0.104606	-0.0874219	0.317579	Immune Response
IFNA1	0.0434535	0.627918	0.652862	0.028701	0.75836	0.007609	-0.0201813	0.531335	Immune Response
IFNB1	-0.0331513	0.295593	0.656741	0.033682	0.555931	0.00162	-0.0679311	0.227936	Immune Response
IL10	-1.73273	0.000354	-0.896589	0.223551	0.0698092	0.186439	-3.0838	0.007662	Immune Response
IL18	-0.0637945	0.782379	-1.75073	0.001507	-0.924148	0.360772	-0.772786	0.007636	Immune Response
IL1B	1.6463	0.00241	-1.52379	0.004063	0.133739	0.714325	-0.318614	0.243793	Immune Response
INPP5D	-0.275514	0.238413	-2.23651	0.001042	-1.0902	0.356671	-1.19132	0.003758	Immune Response
INSIG1	-2.04805	1e-06	-0.855254	0.113587	-0.795527	0.347972	-2.11752	9e-06	Cholesterol Metabolism
IRF7	-0.655839	0.000896	0.20194	0.156751	-0.178008	0.871504	-0.10803	0.433165	Immune Response
ISG15	-0.238412	0.474104	0.532954	0.024242	0.310548	0.098686	-0.00582411	0.832689	Immune Response
LCAT	-0.743063	0.03205	-0.1721	0.993066	-0.118736	0.623108	-0.792882	0.059399	Cholesterol Metabolism
LDLR	-0.599355	0.277576	-0.661921	0.059094	-0.311827	0.909609	-1.21093	0.007587	Cholesterol Metabolism
LIPA	-1.25234	1e-06	-1.57399	0.053173	-1.29	0.48456	-1.49502	0.000497	Triglyceride Metabolism
LPCAT1	-1.00743	0.005484	-0.910785	0.089335	-0.502035	0.493107	-1.27263	0.011256	Triglyceride Metabolism
LPL	-1.65221	1e-06	-2.34387	2.6e-05	-1.40318	0.254133	-2.50687	0.000165	Triglyceride Metabolism
LRP1	-0.267793	0.008175	-1.46537	0.033947	-1.81784	0.316505	0.0957422	0.085852	Cholesterol Metabolism
LSS	-0.921708	3.6e-05	-0.943253	0.038829	-0.85045	0.49655	-0.938861	0.000179	Cholesterol Metabolism
LXR	0.0057509	0.673243	-0.0628514	0.329276	-0.38203	0.394799	0.359487	0.344219	Cholesterol Metabolism
MBTPS1	-1.15527	0.000147	-0.64393	0.096574	-0.0621401	0.646139	-1.67635	5.9e-05	Cholesterol Metabolism
MBTPS2	-0.488646	0.01545	-1.05335	0.003712	-0.531671	0.288495	-1.10046	0.001948	Cholesterol Metabolism
MGAT1	-1.12072	9.1e-05	0.121446	0.436306	0.0288719	0.184081	-1.03724	0.000106	Triglyceride Metabolism
MGLL	-0.14723	0.333771	-0.457597	0.698932	-0.734405	0.977833	0.15294	0.407203	Triglyceride Metabolism
MYD88	-0.150763	0.085653	-0.930931	0.00021	-0.618859	0.107678	-0.429365	0.038369	Immune Response
NLRP3	0.329349	0.244899	-0.835417	0.303761	-0.494578	0.677138	0.591009	0.114951	Immune Response
NPC1	-0.528369	0.000559	-1.4825	0.001238	-0.820678	0.192476	-1.17504	0.000802	Cholesterol Metabolism
PC	-0.561106	0.005284	-0.380289	0.614871	-0.796126	0.256954	0.00875997	0.216778	Carbohydrate Metabolism
PDH	-0.480048	0.002368	-1.43206	0.008069	-1.69053	0.158814	-0.177811	0.162257	Carbohydrate Metabolism
PFKP	-1.74739	0.000688	-0.170889	0.523838	-0.470608	0.151985	-1.30659	0.002415	Carbohydrate Metabolism
PGK1	-0.372173	0.002446	-0.68936	0.003764	-0.570707	0.000528	-0.520293	0.010582	Carbohydrate Metabolism
PISD	-0.580914	0.001582	-0.422769	0.198725	-0.124122	0.755061	-0.858453	0.001214	Phospholipid Metabolism
PKM	-0.250022	0.091435	-0.943674	0.000574	-0.539885	0.003874	-0.65969	0.017822	Carbohydrate Metabolism
PLA2G15	-0.855671	0.000344	-0.76133	0.397125	-1.40623	0.167806	-0.477433	0.046979	Phospholipid Metabolism
PLA2G7	-0.716118	0.000498	-1.13054	0.0061	-0.94181	0.564253	-0.812216	0.005342	Fatty Acid Metabolism
PLCG2	-0.785491	8e-06	-0.67974	0.101465	-0.853391	0.507043	-0.588556	0.001083	Immune Response
PLD1	-0.296708	0.027994	-1.19564	0.16959	-0.909444	0.279202	-0.593967	0.106212	Phospholipid Metabolism
PLIN2	0.341859	0.02155	0.487797	0.0139	0.303209	0.047329	0.635278	0.149563	Triglyceride Metabolism
PLIN3	-0.51513	0.00034	-1.79238	0.005585	-1.27519	0.370231	-1.04755	0.001495	Triglyceride Metabolism
PPARG	0.140105	0.250642	-0.744393	0.346714	-0.618264	0.544415	-0.00938635	0.277459	Fatty Acid Metabolism
SC5D	-0.0577972	0.826714	-1.04569	0.203546	-1.62254	0.073672	0.160181	0.165582	Cholesterol Metabolism
SCARB1	-0.773795	0.000123	-1.22385	0.045101	-1.29775	0.455221	-0.884422	0.007598	Cholesterol Metabolism
SOAT1	0.391417	0.003154	-1.38981	0.02737	-1.08401	0.588944	0.104868	0.466722	Cholesterol Metabolism
SPTLC1	-0.561033	0.000101	-0.948831	0.851116	-1.11842	0.350088	-0.441359	0.451172	Phospholipid Metabolism
SPTLC2	-0.0839088	0.200578	-1.28012	0.012877	-2.33773	0.035732	0.802252	0.635488	Phospholipid Metabolism
SREBP1	-0.0250444	0.700992	-0.333344	0.00034	-0.0798189	0.393398	-0.298783	0.026347	Fatty Acid Metabolism
SREBP2	-0.948879	0.00046	-1.29216	0.006949	-1.1763	0.251186	-1.03847	6.7e-05	Cholesterol Metabolism
STARD4	0.558857	0.006373	-0.423174	0.752486	-0.164429	0.712333	0.480808	0.116524	Cholesterol Metabolism
STARD7	-0.167614	0.106031	-1.14145	0.004926	-0.483807	0.305468	-0.835076	0.016963	Phospholipid Metabolism
TARDBP	-1.54873	1e-06	-0.657133	0.07585	-0.816118	0.949871	-1.38368	0.000201	RNA Processing/Neurodegeneration
TLR4	-1.58246	1e-06	-0.627735	0.453693	-0.448209	0.689595	-1.52459	0.001272	Immune Response
TNFA	-0.195968	0.332088	-2.47775	0.002914	-1.04497	0.483806	-1.6992	0.145161	Immune Response
TPI1	-0.509434	0.014543	0.61185	0.023689	0.205032	0.286242	-0.072058	0.948327	Carbohydrate Metabolism
TREM1	1.69486	0.000931	-1.02921	0.15249	-0.633087	0.321345	0.763509	0.14839	Immune Response
TREM2	-1.93946	1e-06	-2.06415	0.001567	-1.36805	0.111255	-2.63704	7e-05	Immune Response
